# Supplementary material
Source: publisher figshare collection journal article supplement (https://gsajournals.figshare.com/ndownloader/files/17710715)
Supplement: Supplementary file 1 [file 17710715]

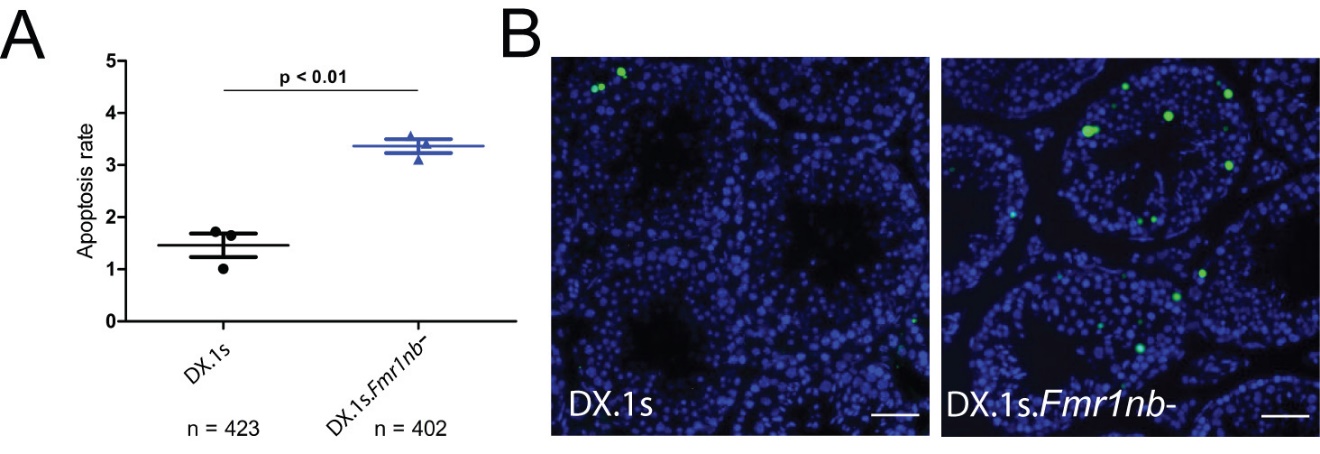


**Figure S6 Apoptosis of spermatogenic cells in B6.DX1s and B6.DX.1s.*Fmr1nb*- males. (A)** Average numbers of apoptotic cells per one tubule were plotted for individual males (N=3) of both genotypes (n, total number of tubules analyzed; p<0.01). **(B)** Apoptotic cells were visualized by FITC fluorescence using TUNEL assay in histological sections of testis of B6.DX.1s wild type and B6.DX.1s.*Fmr1nb*- null mutant genotypes. Scale bar, 50 m.
